# Supplementary material for: Bi-directional roles of IRF-1 on autophagy diminish its prognostic value as compared with Ki67 in liver transplantation for hepatocellular carcinoma
Source: PubMed Central journal article supplement (PMC5122365; doi:10.18632/oncotarget.9365), 2016-05-13
Supplement: oncotarget-07-37979-s001.pdf [file oncotarget-07-37979-s001.pdf]

## Bi-directional roles of IRF-1 on autophagy diminish its prognostic value as compared with Ki67 in liver transplantation for hepatocellular carcinoma

### Supplementary Materials

**Supplementary Table S1: Immunochemical results of biomarker in primary and recurrent HCCs**

|                    | Primary HCC | Recurrent HCC | Parameter        | P     |
|--------------------|-------------|---------------|------------------|-------|
| CK <sup>a</sup>    |             |               | LR = 0.979       | 0.613 |
| –                  | 9           | 3             |                  |       |
| +                  | 25          | 4             |                  |       |
| ++                 | 68          | 18            |                  |       |
| CK19 <sup>a</sup>  |             |               | LR = 0.226       | 0.893 |
| –                  | 80          | 19            |                  |       |
| +                  | 13          | 3             |                  |       |
| ++                 | 9           | 3             |                  |       |
| GPC3 <sup>a</sup>  |             |               | LR = 4.232       | 0.238 |
| –                  | 10          | 3             |                  |       |
| +                  | 31          | 5             |                  |       |
| ++                 | 61          | 16            |                  |       |
| +++                | 0           | 1             |                  |       |
| AFP <sup>a</sup>   |             |               | $\chi^2 = 0.269$ | 0.874 |
| –                  | 42          | 11            |                  |       |
| +                  | 21          | 4             |                  |       |
| ++                 | 39          | 10            |                  |       |
| VEGF <sup>a</sup>  |             |               | LR=1.358         | 0.716 |
| –                  | 41          | 11            |                  |       |
| +                  | 35          | 7             |                  |       |
| ++                 | 24          | 7             |                  |       |
| +++                | 2           | 0             |                  |       |
| EGFR <sup>a</sup>  |             |               | LR = 2.827       | 0.419 |
| –                  | 37          | 12            |                  |       |
| +                  | 21          | 2             |                  |       |
| ++                 | 35          | 9             |                  |       |
| +++                | 9           | 2             |                  |       |
| ERCC1 <sup>b</sup> |             |               | LR = 1.377       | 0.711 |
| –                  | 70          | 18            |                  |       |
| +                  | 13          | 3             |                  |       |
| ++                 | 18          | 3             |                  |       |
| +++                | 1           | 1             |                  |       |
| RRM1 <sup>a</sup>  |             |               | LR = 2.899       | 0.408 |
| –                  | 17          | 6             |                  |       |
| +                  | 30          | 8             |                  |       |

|                    |    |    |                  |       |
|--------------------|----|----|------------------|-------|
| ++                 | 50 | 11 |                  |       |
| +++                | 5  | 0  |                  |       |
| TYMS <sup>a</sup>  |    |    | LR = 2.351       | 0.309 |
| –                  | 73 | 14 |                  |       |
| +                  | 18 | 6  |                  |       |
| ++                 | 11 | 5  |                  |       |
| BRCA1 <sup>b</sup> |    |    | LR = 2.344       | 0.504 |
| –                  | 73 | 20 |                  |       |
| +                  | 12 | 2  |                  |       |
| ++                 | 16 | 2  |                  |       |
| +++                | 1  | 1  |                  |       |
| p53 <sup>b</sup>   |    |    | LR = 7.218       | 0.065 |
| –                  | 68 | 11 |                  |       |
| +                  | 16 | 3  |                  |       |
| ++                 | 14 | 9  |                  |       |
| +++                | 4  | 2  |                  |       |
| VIM <sup>a</sup>   |    |    | LR=5.932         | 0.115 |
| –                  | 54 | 13 |                  |       |
| +                  | 15 | 1  |                  |       |
| ++                 | 33 | 10 |                  |       |
| +++                | 0  | 1  |                  |       |
| Ki-67 <sup>b</sup> |    |    | LR = 1.128       | 0.770 |
| –                  | 52 | 13 |                  |       |
| +                  | 30 | 8  |                  |       |
| ++                 | 15 | 2  |                  |       |
| +++                | 5  | 2  |                  |       |
| IRF-1              |    |    | $\chi^2 = 5.526$ | 0.063 |
| negative           | 36 | 13 |                  |       |
| Plasma positive    | 51 | 6  |                  |       |
| Nucleus positive   | 15 | 6  |                  |       |

a: Determined by expression in cytoplasm or membrane;

b: Determined by expression in nucleus;

LR: Likelihood Ratio.

**Supplementary Table S2: Bonferroni correction for comparisons of RFSs**

| Rank | Grouping method                                                    | <i>p</i> value        | Log Rank $\chi^2$ | Significant* |
|------|--------------------------------------------------------------------|-----------------------|-------------------|--------------|
| 1    | Milan and UCSF criteria <sup>a</sup>                               | $3.8 \times 10^{-14}$ | 61.803            | Yes          |
| 2    | With/without tumor microemboli                                     | $1.7 \times 10^{-11}$ | 45.291            | Yes          |
| 3    | Ki-67 negative/positive                                            | $4.6 \times 10^{-5}$  | 16.589            | Yes          |
| 4    | IRF-1 cytoplasm negative/positive (Beyond Milan criteria Subgroup) | $6.4 \times 10^{-5}$  | 15.980            | Yes          |
| 5    | Ki-67 low/high expression                                          | $1.6 \times 10^{-4}$  | 14.268            | Yes          |
| 6    | p53 negative/positive                                              | 0.009                 | 6.740             | No           |
| 7    | IRF-1 cytoplasm negative/positive                                  | 0.023                 | 5.167             | No           |
| 8    | Low/high differentiation                                           | 0.024                 | 5.113             | No           |
| 9    | BRCA1 low/high expression                                          | 0.038                 | 4.322             | No           |
| 10   | CK low/high expression                                             | 0.102                 | 2.680             | No           |
| 11   | TYMS low/high expression                                           | 0.105                 | 2.622             | No           |
| 12   | ERCC1 low/high expression                                          | 0.162                 | 1.955             | No           |
| 13   | VEGF negative/positive                                             | 0.225                 | 1.472             | No           |
| 14   | AFP low/high expression                                            | 0.231                 | 1.436             | No           |
| 15   | GPC3 low/high expression                                           | 0.233                 | 1.423             | No           |
| 16   | IRF-1 nuclear negative/positive                                    | 0.244                 | 1.358             | No           |
| 17   | BRCA1 negative/positive                                            | 0.410                 | 0.678             | No           |
| 18   | CK negative/positive                                               | 0.414                 | 0.668             | No           |
| 19   | VIM low/high expression                                            | 0.440                 | 0.596             | No           |
| 20   | EGFR negative/positive                                             | 0.444                 | 0.587             | No           |
| 21   | ERCC1 negative/positive                                            | 0.503                 | 0.448             | No           |
| 22   | AFP negative/positive                                              | 0.518                 | 0.417             | No           |
| 23   | GPC3 negative/positive                                             | 0.547                 | 0.364             | No           |
| 24   | EGFR low/high expression                                           | 0.612                 | 0.257             | No           |
| 25   | VIM negative/positive                                              | 0.711                 | 0.137             | No           |
| 26   | RRM1 low/high expression                                           | 0.767                 | 0.088             | No           |
| 27   | p53 low/high expression                                            | 0.778                 | 0.079             | No           |
| 28   | CK19 low/high expression                                           | 0.852                 | 0.035             | No           |
| 29   | CK19 negative/positive                                             | 0.864                 | 0.029             | No           |
| 30   | TYMS negative/positive                                             | 0.891                 | 0.019             | No           |
| 31   | Primary/recurrent HCC                                              | 0.896                 | 0.017             | No           |
| 32   | RRM1 negative/positive                                             | 0.927                 | 0.009             | No           |
| 33   | VEGF low/high expression                                           | 0.951                 | 0.004             | No           |

a: Cases were stratified into 3 levels: within Milan criteria (level 1), between Milan and UCSF criteria (level 2) and beyond UCSF criteria (level 3);

\*: Bonferroni correction,  $\alpha' = 1.5 \times 10^{-3}$ .
